# Supplementary material for: Regional Gray Matter Volume Changes in Parkinson’s Disease with Orthostatic Hypotension
Source: MDPI journal article supplement (doi:10.3390/brainsci11030294), 2021-02-26
Supplement: s1 [file s1]

**Supplementary Table.** Qualitative scoring method for the pentagon copying test (QSPT).

| Parameters               | Performance scores                                                                                     | Assigned scores |
|--------------------------|--------------------------------------------------------------------------------------------------------|-----------------|
| 1. Number of angles      | 10                                                                                                     | 4               |
|                          | $10 \pm 1$                                                                                             | 3               |
|                          | $10 \pm 2$                                                                                             | 2               |
|                          | 5-7                                                                                                    | 1               |
|                          | <5 or >13                                                                                              | 0               |
| 2. Distance/Intersection | Correct intersection                                                                                   | 4               |
|                          | Wrong intersection                                                                                     | 3               |
|                          | Contact without intersection                                                                           | 2               |
|                          | No contact, distance < 1cm                                                                             | 1               |
|                          | No contact, distance > 1cm                                                                             | 0               |
| 3. Closure/opening*      | Closing both figures                                                                                   | 2               |
|                          | Closing only one figure                                                                                | 1               |
|                          | Opening both figures                                                                                   | 0               |
| 4. Rotation**            | Correct orientation of both figures                                                                    | 2               |
|                          | Rotation of one figure (either one figure is absent or it is not a pentagon then it is not assessable) | 1               |
|                          | Rotation of both figures (or both not assessable like pentagons)                                       | 0               |
| 5. Closing-in            | Absent                                                                                                 | 1               |
|                          | Present                                                                                                | 0               |
| Total                    | Sum of 1-5                                                                                             | 0-13            |

\*Figure is considered close even though two sides do not touch each other, but the distance is  $\leq 1$  mm.

\*\*When there is not a figure or figure is not a pentagon (then rotation is not assessable) score is 0. When rotation is less than  $45^\circ$ , figure is not considered rotated. Tremor is ignored.
